# Supplementary material for: Metformin reverses oxidative stress-induced mitochondrial dysfunction in pre-osteoblasts via the EGFR/GSK-3β/calcium pathway
Source: PubMed Central journal article supplement — Int J Mol Med. 2023 Mar 27;51(4):36. doi: 10.3892/ijmm.2023.5239 (PMC10049025; doi:10.3892/ijmm.2023.5239), 2023-03-27

Figure S1. The expression and regulation of negative regulation of protein modification process was examined using gene set enrichment analysis.

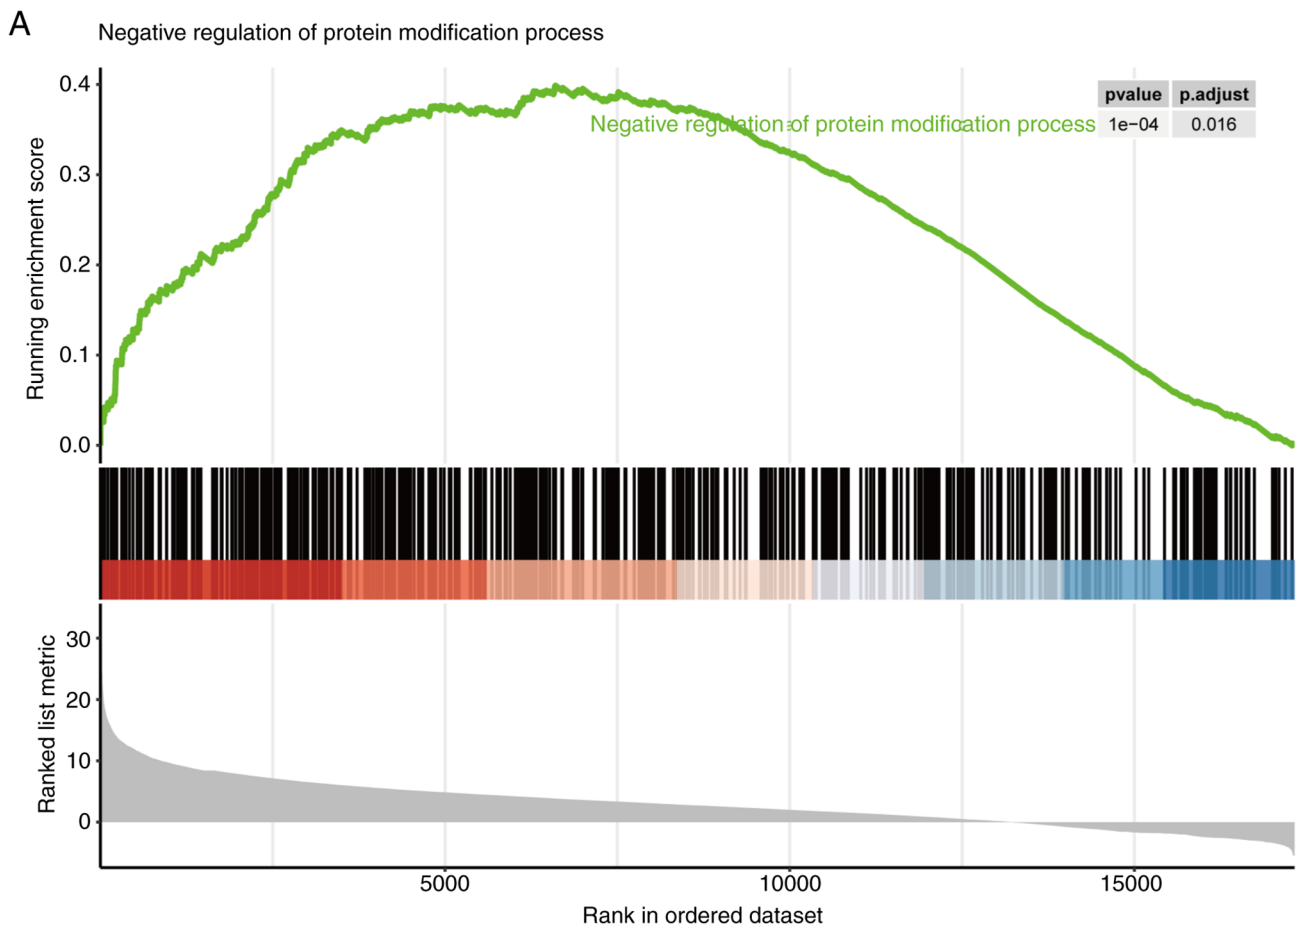

Supplement: Supplementary_Data.pdf [file Supplementary_Data.pdf]
